# Supplementary material for: LncRNA LINC00668 promotes cell proliferation, migration, invasion ability and EMT process in hepatocellular carcinoma by targeting miR-532-5p/YY1 axis
Source: PubMed Central journal article supplement (PMC7214398; doi:10.1042/bsr20192697), 2020-05-11
Supplement: BSR-2019-2697_supp.pdf [file BSR-2019-2697_supp.pdf]

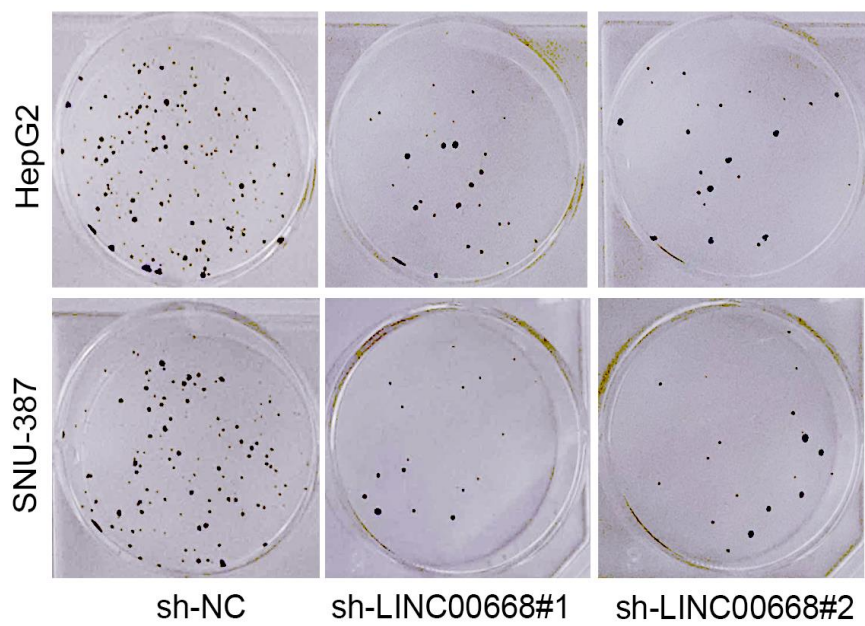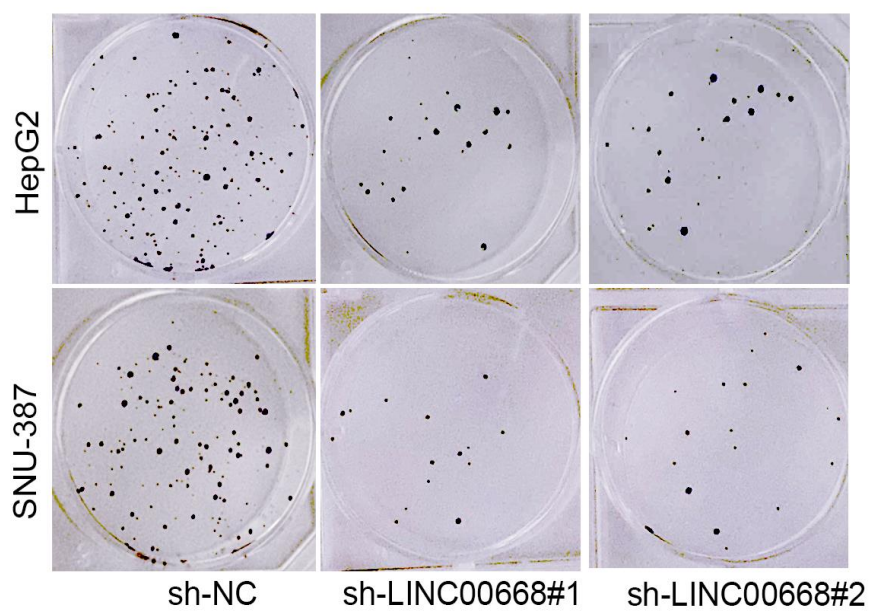

**Supplementary Figure 1** Pictures of another two independent colony formation experiments conducted in cells facing knockdown of LINC00668.
